# Supplementary material for: A self-powered insulin patch pump with a superabsorbent polymer as a biodegradable battery substitute
Source: Royal Society of Chemistry journal article supplement (doi:10.1039/d0tb00385a), 2020-01-01
Supplement: d0tb00385a1.pdf [file d0tb00385a1.pdf]

*Supporting Information*

**Self-powered insulin patch pump with superabsorbent polymer as  
biodegradable battery substitute**

<sup>1</sup>Jiaying Shao, <sup>2</sup>King Ho Holden Li, <sup>3</sup>Ahjeong Son, <sup>1,\*</sup>Beelee Chua

<sup>1</sup>School of Electrical Engineering, Korea University, Seoul, Republic of Korea

<sup>2</sup> School of Mechanical and Aerospace Engineering, Nanyang Technological University, 50  
Nanyang Avenue, Block N3, 639798 Singapore.

<sup>3</sup>Department of Environmental Science and Engineering, 52 Ewhayeodae-gil, Seodaemun-gu,  
Ewha Womans University, Seoul 03760, Republic of Korea.

\*Corresponding Author, Beelee Chua: Current address. 145 Anam-ro, Seongbuk-gu, Korea  
University, Seoul 02841, Republic of Korea; Email. [bchua@korea.ac.kr](mailto:bchua@korea.ac.kr),  
[chuabeelee@gmail.com](mailto:chuabeelee@gmail.com)

15

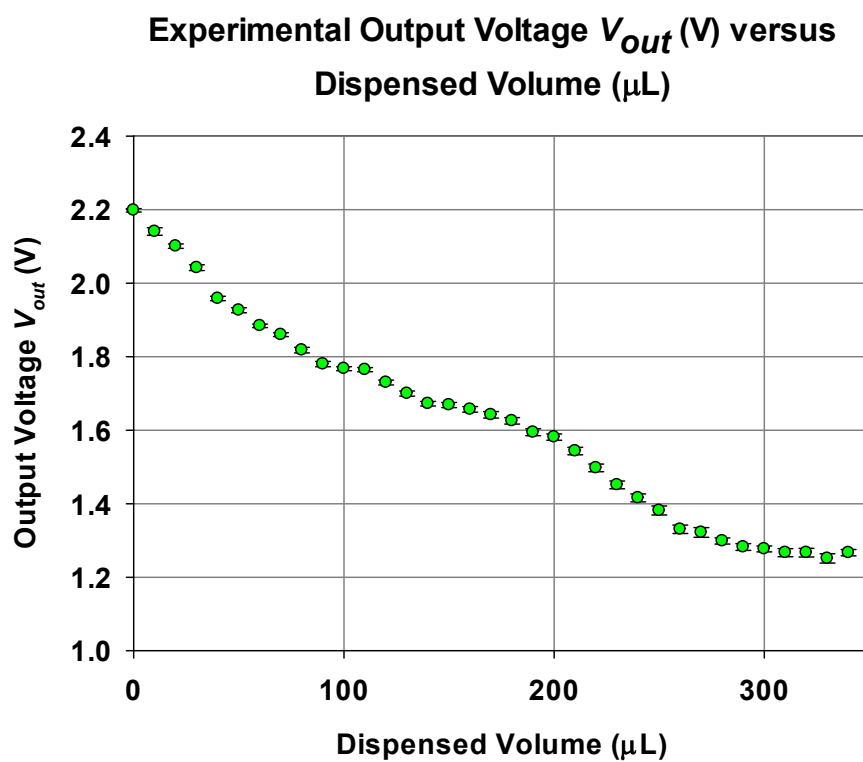

16

17

18 **Figure S1:** Experimental output voltage  $V_{out}$  (V) versus dispensed volume ( $\mu\text{L}$ ) with standard  
19 deviation.
